# Supplementary material for: The effect of a mixture of an ionic liquid and organic solvent on oxygen reduction reaction kinetics
Source: Royal Society of Chemistry journal article supplement (doi:10.1039/d2cp00698g), 2022-01-01
Supplement: d2cp00698g1.pdf [file d2cp00698g1.pdf]

## Supporting Information

# The Effect of Mixture of Ionic Liquid and Organic Solvent on Oxygen Reduction Reaction Kinetics

Sergey Pavlov,<sup>a,b\*</sup> Valentina Danilova,<sup>a</sup> Vyacheslav Sivakov,<sup>a</sup> and Sergey Kislenko<sup>a</sup>

<sup>a</sup> Joint Institute for High Temperatures of RAS, Izhorskaya 13/19, 125412 Moscow, Russia

<sup>b</sup> Skolkovo Institute of Science and Technology, Skolkovo Innovation Center, 143026 Moscow, Russia

### Force field parameters in Gromacs format

[ atomtypes ]

; name at.num mass charge ptype sigma epsilon

; DME

|     |   |         |        |   |        |         |
|-----|---|---------|--------|---|--------|---------|
| O   | 8 | 15.9994 | -0.400 | A | 0.2900 | 0.58576 |
| CT2 | 6 | 12.0112 | 0.140  | A | 0.3500 | 0.27614 |
| CT3 | 6 | 12.0112 | 0.110  | A | 0.3500 | 0.27614 |
| H   | 1 | 1.0079  | 0.030  | A | 0.2500 | 0.12552 |

; pyrrolidinium JPCB108(2004)16893

|    |   |        |        |   |       |         |
|----|---|--------|--------|---|-------|---------|
| CT | 6 | 12.011 | -0.136 | A | 0.350 | 0.27614 |
| HC | 1 | 1.008  | 0.104  | A | 0.250 | 0.12552 |
| NT | 7 | 14.007 | 0.096  | A | 0.325 | 0.71128 |

; TFSI

|    |    |         |      |   |       |         |
|----|----|---------|------|---|-------|---------|
| SO | 16 | 32.064  | 0.6  | A | 0.355 | 1.04600 |
| OS | 8  | 15.9994 | -0.4 | A | 0.296 | 0.87864 |
| FC | 9  | 18.9984 | -0.1 | A | 0.295 | 0.22175 |
| CF | 6  | 12.011  | 0.3  | A | 0.350 | 0.27614 |
| NI | 7  | 14.0027 | -0.4 | A | 0.325 | 0.71128 |

; Li+ O2-

|     |   |         |          |   |        |         |
|-----|---|---------|----------|---|--------|---------|
| Li  | 3 | 6.941   | 0.7071   | A | 0.2126 | 0.07648 |
| OA  | 8 | 15.9994 | -0.35355 | A | 0.2960 | 0.87864 |
| OAA | 8 | 15.9994 | -0.7071  | A | 0.2960 | 0.87864 |

; CO3 2-

|    |   |         |         |   |                |
|----|---|---------|---------|---|----------------|
| CO | 6 | 12.011  | 1.0227  | A | 0.3500 0.27614 |
| OC | 8 | 15.9994 | -0.8123 | A | 0.2960 0.87864 |

[ moleculetype ]

```
; molname      nrexcl
      DME        3
```

[ atoms ]

```
; nr  type      resnr      residu      atom      cgnr      charge      mass
  1  CT3        1          DME        C1         1          0.110  12.0112
  2   H         1          DME        H1         1          0.030   1.0079
  3   H         1          DME        H2         1          0.030   1.0079
  4   H         1          DME        H3         1          0.030   1.0079
  5  CT2        1          DME        C2         1          0.140  12.0112
  6   H         1          DME        H4         1          0.030   1.0079
  7   H         1          DME        H5         1          0.030   1.0079
  8  CT2        1          DME        C3         1          0.140  12.0112
  9   H         1          DME        H6         1          0.030   1.0079
 10   H         1          DME        H7         1          0.030   1.0079
 11  CT3        1          DME        C4         1          0.110  12.0112
 12   H         1          DME        H8         1          0.030   1.0079
 13   H         1          DME        H9         1          0.030   1.0079
 14   H         1          DME        H10        1          0.030   1.0079
 15   O         1          DME        O1         1         -0.400  15.9994
 16   O         1          DME        O2         1         -0.400  15.9994
```

[ bonds ]

```
; i  j      funct      length      force.c.
  1 15 1          0.1410 267776
 15 5 1          0.1410 267776
  5 8 1          0.1529 224262.4
  8 16 1         0.1410 267776
```

|        |               |
|--------|---------------|
| 16 111 | 0.1410 267776 |
| 1 2 1  | 0.1090 284512 |
| 1 3 1  | 0.1090 284512 |
| 1 4 1  | 0.1090 284512 |
| 5 6 1  | 0.1090 284512 |
| 5 7 1  | 0.1090 284512 |
| 8 9 1  | 0.1090 284512 |
| 8 10 1 | 0.1090 284512 |
| 11 121 | 0.1090 284512 |
| 11 131 | 0.1090 284512 |
| 11 141 | 0.1090 284512 |

[ angles ]

| ; i | j k   | funct | angle | force.c. |
|-----|-------|-------|-------|----------|
| 2   | 1 3   | 1     | 107.8 | 276.144  |
| 3   | 1 4   | 1     | 107.8 | 276.144  |
| 4   | 1 2   | 1     | 107.8 | 276.144  |
| 1   | 15 5  | 1     | 109.5 | 502.08   |
| 15  | 5 8   | 1     | 109.5 | 418.4    |
| 5   | 8 16  | 1     | 109.5 | 418.4    |
| 8   | 16 11 | 1     | 109.5 | 502.08   |
| 2   | 1 15  | 1     | 109.5 | 292.88   |
| 3   | 1 15  | 1     | 109.5 | 292.88   |
| 4   | 1 15  | 1     | 109.5 | 292.88   |
| 15  | 5 6   | 1     | 109.5 | 292.88   |
| 15  | 5 7   | 1     | 109.5 | 292.88   |
| 6   | 5 7   | 1     | 107.8 | 276.144  |
| 6   | 5 8   | 1     | 110.7 | 313.8    |
| 7   | 5 8   | 1     | 110.7 | 313.8    |
| 5   | 8 9   | 1     | 110.7 | 313.8    |
| 5   | 8 10  | 1     | 110.7 | 313.8    |
| 9   | 8 16  | 1     | 109.5 | 292.88   |

|    |    |    |   |       |         |
|----|----|----|---|-------|---------|
| 10 | 8  | 16 | 1 | 109.5 | 292.88  |
| 9  | 8  | 10 | 1 | 107.8 | 276.144 |
| 16 | 11 | 12 | 1 | 109.5 | 292.88  |
| 16 | 11 | 13 | 1 | 109.5 | 292.88  |
| 16 | 11 | 14 | 1 | 109.5 | 292.88  |
| 12 | 11 | 13 | 1 | 107.8 | 276.144 |
| 13 | 11 | 14 | 1 | 107.8 | 276.144 |
| 14 | 11 | 12 | 1 | 107.8 | 276.144 |

[ dihedrals ]

| ; i | j  | k  | l  | funct | C1      | C2       | C3      | C4      |
|-----|----|----|----|-------|---------|----------|---------|---------|
| 1   | 15 | 5  | 8  | 5     | 6.9781  | -2.3652  | -0.0138 | -1.2263 |
| 15  | 5  | 8  | 16 | 5     | 11.7980 | -10.7136 | 3.4376  | -3.8505 |
| 5   | 8  | 16 | 11 | 5     | 6.9781  | -2.3652  | -0.0138 | -1.2263 |
| 2   | 1  | 15 | 5  | 5     | 0.0000  | 0.0000   | 3.1798  | 0.0000  |
| 3   | 1  | 15 | 5  | 5     | 0.0000  | 0.0000   | 3.1798  | 0.0000  |
| 4   | 1  | 15 | 5  | 5     | 0.0000  | 0.0000   | 3.1798  | 0.0000  |
| 6   | 5  | 15 | 1  | 5     | 0.0000  | 0.0000   | 3.1798  | 0.0000  |
| 7   | 5  | 15 | 1  | 5     | 0.0000  | 0.0000   | 3.1798  | 0.0000  |
| 6   | 5  | 8  | 9  | 5     | 0.0000  | 0.0000   | 1.2552  | 0.0000  |
| 7   | 5  | 8  | 9  | 5     | 0.0000  | 0.0000   | 1.2552  | 0.0000  |
| 6   | 5  | 8  | 10 | 5     | 0.0000  | 0.0000   | 1.2552  | 0.0000  |
| 7   | 5  | 8  | 10 | 5     | 0.0000  | 0.0000   | 1.2552  | 0.0000  |
| 15  | 5  | 8  | 9  | 5     | 0.0000  | 0.0000   | 1.9581  | 0.0000  |
| 15  | 5  | 8  | 10 | 5     | 0.0000  | 0.0000   | 1.9581  | 0.0000  |
| 9   | 8  | 16 | 11 | 5     | 0.0000  | 0.0000   | 3.1798  | 0.0000  |
| 10  | 8  | 16 | 11 | 5     | 0.0000  | 0.0000   | 3.1798  | 0.0000  |
| 8   | 16 | 11 | 12 | 5     | 0.0000  | 0.0000   | 3.1798  | 0.0000  |
| 8   | 16 | 11 | 13 | 5     | 0.0000  | 0.0000   | 3.1798  | 0.0000  |
| 8   | 16 | 11 | 14 | 5     | 0.0000  | 0.0000   | 3.1798  | 0.0000  |
| 16  | 8  | 5  | 6  | 5     | 0.0000  | 0.0000   | 1.9581  | 0.0000  |
| 16  | 8  | 5  | 7  | 5     | 0.0000  | 0.0000   | 1.9581  | 0.0000  |

[ moleculetype ]

; Name nrexcl

PYR 3

[ atoms ]

| ; nr | type | resnr | residue | atom | cgnr | charge        |
|------|------|-------|---------|------|------|---------------|
| mass |      |       |         |      |      |               |
| 1    | NT   | 1     | PYR     | N1   | 0    | 0.096 14.0067 |
| 2    | CT   | 1     | PYR     | C2   | 1    | -0.136 12.011 |
| 3    | CT   | 1     | PYR     | C3   | 2    | -0.136 12.011 |
| 4    | CT   | 1     | PYR     | C4   | 3    | 0.008 12.011  |
| 5    | CT   | 1     | PYR     | C5   | 4    | 0.008 12.011  |
| 6    | CT   | 1     | PYR     | C6   | 5    | -0.136 12.011 |
| 7    | CT   | 1     | PYR     | C7   | 6    | -0.136 12.011 |
| 8    | HC   | 1     | PYR     | H8   | 7    | 0.104 1.008   |
| 9    | HC   | 1     | PYR     | H9   | 8    | 0.104 1.008   |
| 10   | HC   | 1     | PYR     | H10  | 9    | 0.104 1.008   |
| 11   | HC   | 1     | PYR     | H11  | 10   | 0.104 1.008   |
| 12   | HC   | 1     | PYR     | H12  | 11   | 0.048 1.008   |
| 13   | HC   | 1     | PYR     | H13  | 12   | 0.048 1.008   |
| 14   | HC   | 1     | PYR     | H14  | 13   | 0.048 1.008   |
| 15   | HC   | 1     | PYR     | H15  | 14   | 0.048 1.008   |
| 16   | HC   | 1     | PYR     | H16  | 15   | 0.104 1.008   |
| 17   | HC   | 1     | PYR     | H17  | 16   | 0.104 1.008   |
| 18   | HC   | 1     | PYR     | H18  | 17   | 0.104 1.008   |
| 19   | HC   | 1     | PYR     | H19  | 18   | 0.104 1.008   |
| 20   | HC   | 1     | PYR     | H20  | 19   | 0.104 1.008   |
| 21   | CT   | 1     | PYR     | C21  | 20   | 0.008 12.011  |
| 22   | HC   | 1     | PYR     | H22  | 21   | 0.048 1.008   |
| 23   | HC   | 1     | PYR     | H23  | 22   | 0.048 1.008   |
| 24   | CT   | 1     | PYR     | C24  | 23   | -0.12 12.011  |
| 25   | HC   | 1     | PYR     | H25  | 24   | 0.06 1.008    |

|    |    |   |     |     |    |       |        |
|----|----|---|-----|-----|----|-------|--------|
| 26 | HC | 1 | PYR | H26 | 25 | 0.06  | 1.008  |
| 27 | CT | 1 | PYR | C27 | 26 | -0.18 | 12.011 |
| 28 | HC | 1 | PYR | H28 | 27 | 0.06  | 1.008  |
| 29 | HC | 1 | PYR | H29 | 28 | 0.06  | 1.008  |
| 30 | HC | 1 | PYR | H30 | 29 | 0.06  | 1.008  |

[ bonds ]

; ai aj funct

|    |    |   |        |          |
|----|----|---|--------|----------|
| 1  | 2  | 1 | 0.1471 | 307100.0 |
| 1  | 3  | 1 | 0.1471 | 307100.0 |
| 1  | 6  | 1 | 0.1471 | 307100.0 |
| 1  | 7  | 1 | 0.1471 | 307100.0 |
| 2  | 4  | 1 | 0.1529 | 224200   |
| 2  | 8  | 1 | 0.1090 | 284500   |
| 2  | 9  | 1 | 0.1090 | 284500   |
| 4  | 12 | 1 | 0.1090 | 284500   |
| 4  | 13 | 1 | 0.1090 | 284500   |
| 4  | 5  | 1 | 0.1529 | 224200   |
| 5  | 14 | 1 | 0.1090 | 284500   |
| 5  | 15 | 1 | 0.1090 | 284500   |
| 5  | 3  | 1 | 0.1529 | 224200   |
| 3  | 10 | 1 | 0.1090 | 284500   |
| 3  | 11 | 1 | 0.1090 | 284500   |
| 6  | 16 | 1 | 0.1090 | 284500   |
| 6  | 17 | 1 | 0.1090 | 284500   |
| 6  | 18 | 1 | 0.1090 | 284500   |
| 7  | 19 | 1 | 0.1090 | 284500   |
| 7  | 20 | 1 | 0.1090 | 284500   |
| 7  | 21 | 1 | 0.1529 | 224200   |
| 21 | 22 | 1 | 0.1090 | 284500   |
| 21 | 23 | 1 | 0.1090 | 284500   |
| 21 | 24 | 1 | 0.1529 | 224200   |

|    |    |   |        |        |
|----|----|---|--------|--------|
| 24 | 25 | 1 | 0.1090 | 284500 |
| 24 | 26 | 1 | 0.1090 | 284500 |
| 24 | 27 | 1 | 0.1529 | 224200 |
| 27 | 28 | 1 | 0.1090 | 284500 |
| 27 | 29 | 1 | 0.1090 | 284500 |
| 27 | 30 | 1 | 0.1090 | 284500 |

[ angles ]

| ; ai | aj | ak | funct | c0    | c1    | c2    | c3 |
|------|----|----|-------|-------|-------|-------|----|
| 2    | 4  | 5  | 1     | 112.7 | 488.3 |       |    |
| 3    | 5  | 4  | 1     | 112.7 | 488.3 |       |    |
| 7    | 21 | 24 | 1     |       | 112.7 | 488.3 |    |
| 21   | 24 | 27 | 1     |       | 112.7 | 488.3 |    |
|      |    |    |       |       |       |       |    |
| 2    | 4  | 12 | 1     | 110.7 | 313.8 |       |    |
| 2    | 4  | 13 | 1     | 110.7 | 313.8 |       |    |
| 4    | 2  | 8  | 1     | 110.7 | 313.8 |       |    |
| 4    | 2  | 9  | 1     | 110.7 | 313.8 |       |    |
| 4    | 5  | 14 | 1     | 110.7 | 313.8 |       |    |
| 4    | 5  | 15 | 1     | 110.7 | 313.8 |       |    |
| 5    | 4  | 12 | 1     | 110.7 | 313.8 |       |    |
| 5    | 4  | 13 | 1     | 110.7 | 313.8 |       |    |
| 5    | 3  | 10 | 1     | 110.7 | 313.8 |       |    |
| 5    | 3  | 11 | 1     | 110.7 | 313.8 |       |    |
| 3    | 5  | 14 | 1     | 110.7 | 313.8 |       |    |
| 3    | 5  | 14 | 1     | 110.7 | 313.8 |       |    |
| 7    | 21 | 22 | 1     | 110.7 | 313.8 |       |    |
| 7    | 21 | 23 | 1     | 110.7 | 313.8 |       |    |
| 21   | 7  | 19 | 1     | 110.7 | 313.8 |       |    |
| 21   | 7  | 20 | 1     | 110.7 | 313.8 |       |    |
| 21   | 24 | 25 | 1     | 110.7 | 313.8 |       |    |
| 21   | 24 | 26 | 1     | 110.7 | 313.8 |       |    |

|    |    |    |   |       |       |
|----|----|----|---|-------|-------|
| 24 | 21 | 22 | 1 | 110.7 | 313.8 |
| 24 | 21 | 23 | 1 | 110.7 | 313.8 |
| 24 | 27 | 28 | 1 | 110.7 | 313.8 |
| 24 | 27 | 29 | 1 | 110.7 | 313.8 |
| 24 | 27 | 30 | 1 | 110.7 | 313.8 |
| 27 | 24 | 25 | 1 | 110.7 | 313.8 |
| 27 | 24 | 26 | 1 | 110.7 | 313.8 |

|    |    |    |   |       |       |
|----|----|----|---|-------|-------|
| 8  | 2  | 9  | 1 | 107.8 | 276.1 |
| 12 | 4  | 13 | 1 | 107.8 | 276.1 |
| 14 | 5  | 15 | 1 | 107.8 | 276.1 |
| 10 | 3  | 11 | 1 | 107.8 | 276.1 |
| 16 | 6  | 17 | 1 | 107.8 | 276.1 |
| 16 | 6  | 18 | 1 | 107.8 | 276.1 |
| 17 | 6  | 18 | 1 | 107.8 | 276.1 |
| 19 | 7  | 20 | 1 | 107.8 | 276.1 |
| 22 | 21 | 23 | 1 | 107.8 | 276.1 |
| 25 | 24 | 26 | 1 | 107.8 | 276.1 |
| 28 | 27 | 29 | 1 | 107.8 | 276.1 |
| 28 | 27 | 30 | 1 | 107.8 | 276.1 |
| 29 | 27 | 30 | 1 | 107.8 | 276.1 |

|   |   |    |   |       |       |
|---|---|----|---|-------|-------|
| 1 | 3 | 5  | 1 | 109.5 | 669.4 |
| 1 | 2 | 4  | 1 | 109.5 | 669.4 |
| 1 | 7 | 21 | 1 | 109.5 | 669.4 |

|   |   |   |   |       |       |
|---|---|---|---|-------|-------|
| 2 | 1 | 3 | 1 | 109.5 | 418.4 |
| 6 | 1 | 7 | 1 | 109.5 | 418.4 |
| 3 | 1 | 7 | 1 | 109.5 | 418.4 |
| 2 | 1 | 6 | 1 | 109.5 | 418.4 |
| 2 | 1 | 7 | 1 | 109.5 | 418.4 |
| 3 | 1 | 6 | 1 | 109.5 | 418.4 |



|    |   |   |   |       |       |
|----|---|---|---|-------|-------|
| 10 | 3 | 1 | 1 | 109.5 | 209.2 |
| 11 | 3 | 1 | 1 | 109.5 | 209.2 |
| 8  | 2 | 1 | 1 | 109.5 | 209.2 |
| 9  | 2 | 1 | 1 | 109.5 | 209.2 |
| 16 | 6 | 1 | 1 | 109.5 | 209.2 |
| 17 | 6 | 1 | 1 | 109.5 | 209.2 |
| 18 | 6 | 1 | 1 | 109.5 | 209.2 |
| 19 | 7 | 1 | 1 | 109.5 | 209.2 |
| 20 | 7 | 1 | 1 | 109.5 | 209.2 |

[ dihedrals ]

| ; ai | aj | ak | al | funct | c0 | c1 | c2 | c3 | c4 | c5 |
|------|----|----|----|-------|----|----|----|----|----|----|
|------|----|----|----|-------|----|----|----|----|----|----|

;HC-CT-CT-HC

|    |    |    |    |   |        |        |        |        |  |  |
|----|----|----|----|---|--------|--------|--------|--------|--|--|
| 9  | 2  | 4  | 12 | 5 | 0.0000 | 0.0000 | 1.3305 | 0.0000 |  |  |
| 9  | 2  | 4  | 13 | 5 | 0.0000 | 0.0000 | 1.3305 | 0.0000 |  |  |
| 8  | 2  | 4  | 12 | 5 | 0.0000 | 0.0000 | 1.3305 | 0.0000 |  |  |
| 8  | 2  | 4  | 13 | 5 | 0.0000 | 0.0000 | 1.3305 | 0.0000 |  |  |
| 12 | 4  | 5  | 14 | 5 | 0.0000 | 0.0000 | 1.3305 | 0.0000 |  |  |
| 12 | 4  | 5  | 15 | 5 | 0.0000 | 0.0000 | 1.3305 | 0.0000 |  |  |
| 13 | 4  | 5  | 14 | 5 | 0.0000 | 0.0000 | 1.3305 | 0.0000 |  |  |
| 13 | 4  | 5  | 15 | 5 | 0.0000 | 0.0000 | 1.3305 | 0.0000 |  |  |
| 25 | 24 | 27 | 28 | 5 | 0.0000 | 0.0000 | 1.3305 | 0.0000 |  |  |
| 25 | 24 | 27 | 29 | 5 | 0.0000 | 0.0000 | 1.3305 | 0.0000 |  |  |
| 25 | 24 | 27 | 30 | 5 | 0.0000 | 0.0000 | 1.3305 | 0.0000 |  |  |
| 26 | 24 | 27 | 28 | 5 | 0.0000 | 0.0000 | 1.3305 | 0.0000 |  |  |
| 26 | 24 | 27 | 29 | 5 | 0.0000 | 0.0000 | 1.3305 | 0.0000 |  |  |
| 26 | 24 | 27 | 30 | 5 | 0.0000 | 0.0000 | 1.3305 | 0.0000 |  |  |
| 14 | 5  | 3  | 10 | 5 | 0.0000 | 0.0000 | 1.3305 | 0.0000 |  |  |
| 14 | 5  | 3  | 11 | 5 | 0.0000 | 0.0000 | 1.3305 | 0.0000 |  |  |
| 15 | 5  | 3  | 10 | 5 | 0.0000 | 0.0000 | 1.3305 | 0.0000 |  |  |
| 15 | 5  | 3  | 11 | 5 | 0.0000 | 0.0000 | 1.3305 | 0.0000 |  |  |

|    |    |    |    |   |        |        |        |        |
|----|----|----|----|---|--------|--------|--------|--------|
| 19 | 7  | 21 | 23 | 5 | 0.0000 | 0.0000 | 1.3305 | 0.0000 |
| 19 | 7  | 21 | 22 | 5 | 0.0000 | 0.0000 | 1.3305 | 0.0000 |
| 20 | 7  | 21 | 23 | 5 | 0.0000 | 0.0000 | 1.3305 | 0.0000 |
| 20 | 7  | 21 | 22 | 5 | 0.0000 | 0.0000 | 1.3305 | 0.0000 |
| 22 | 21 | 24 | 25 | 5 | 0.0000 | 0.0000 | 1.3305 | 0.0000 |
| 22 | 21 | 24 | 26 | 5 | 0.0000 | 0.0000 | 1.3305 | 0.0000 |
| 23 | 21 | 24 | 25 | 5 | 0.0000 | 0.0000 | 1.3305 | 0.0000 |
| 23 | 21 | 24 | 26 | 5 | 0.0000 | 0.0000 | 1.3305 | 0.0000 |

;CT-CT-CT-HC

|    |    |    |    |   |        |        |        |        |
|----|----|----|----|---|--------|--------|--------|--------|
| 2  | 4  | 5  | 14 | 5 | 0.0000 | 0.0000 | 1.5313 | 0.0000 |
| 2  | 4  | 5  | 15 | 5 | 0.0000 | 0.0000 | 1.5313 | 0.0000 |
| 4  | 5  | 3  | 10 | 5 | 0.0000 | 0.0000 | 1.5313 | 0.0000 |
| 4  | 5  | 3  | 11 | 5 | 0.0000 | 0.0000 | 1.5313 | 0.0000 |
| 3  | 5  | 4  | 12 | 5 | 0.0000 | 0.0000 | 1.5313 | 0.0000 |
| 3  | 5  | 4  | 13 | 5 | 0.0000 | 0.0000 | 1.5313 | 0.0000 |
| 5  | 4  | 2  | 8  | 5 | 0.0000 | 0.0000 | 1.5313 | 0.0000 |
| 5  | 4  | 2  | 9  | 5 | 0.0000 | 0.0000 | 1.5313 | 0.0000 |
| 7  | 21 | 24 | 25 | 5 | 0.0000 | 0.0000 | 1.5313 | 0.0000 |
| 7  | 21 | 24 | 26 | 5 | 0.0000 | 0.0000 | 1.5313 | 0.0000 |
| 21 | 24 | 27 | 28 | 5 | 0.0000 | 0.0000 | 1.5313 | 0.0000 |
| 21 | 24 | 27 | 29 | 5 | 0.0000 | 0.0000 | 1.5313 | 0.0000 |
| 21 | 24 | 27 | 30 | 5 | 0.0000 | 0.0000 | 1.5313 | 0.0000 |
| 27 | 24 | 21 | 22 | 5 | 0.0000 | 0.0000 | 1.5313 | 0.0000 |
| 27 | 24 | 21 | 23 | 5 | 0.0000 | 0.0000 | 1.5313 | 0.0000 |
| 24 | 21 | 7  | 19 | 5 | 0.0000 | 0.0000 | 1.5313 | 0.0000 |
| 24 | 21 | 7  | 20 | 5 | 0.0000 | 0.0000 | 1.5313 | 0.0000 |

;CT-CT-CT-CT

|   |    |    |    |   |        |         |        |        |
|---|----|----|----|---|--------|---------|--------|--------|
| 2 | 4  | 5  | 3  | 5 | 7.2800 | -0.6569 | 1.1673 | 0.0000 |
| 7 | 21 | 24 | 27 | 5 | 7.2800 | -0.6569 | 1.1673 | 0.0000 |

;HC-CT-CT-NT

|    |   |   |   |   |         |         |        |        |
|----|---|---|---|---|---------|---------|--------|--------|
| 14 | 5 | 3 | 1 | 5 | -4.2384 | -2.9665 | 1.9790 | 0.0000 |
| 15 | 5 | 3 | 1 | 5 | -4.2384 | -2.9665 | 1.9790 | 0.0000 |

|    |    |   |   |   |         |         |        |        |
|----|----|---|---|---|---------|---------|--------|--------|
| 12 | 4  | 2 | 1 | 5 | -4.2384 | -2.9665 | 1.9790 | 0.0000 |
| 13 | 4  | 2 | 1 | 5 | -4.2384 | -2.9665 | 1.9790 | 0.0000 |
| 22 | 21 | 7 | 1 | 5 | -4.2384 | -2.9665 | 1.9790 | 0.0000 |
| 23 | 21 | 7 | 1 | 5 | -4.2384 | -2.9665 | 1.9790 | 0.0000 |

;CT-CT-CT-NT

|    |    |   |   |   |         |         |        |        |
|----|----|---|---|---|---------|---------|--------|--------|
| 5  | 4  | 2 | 1 | 5 | 10.0081 | -2.8200 | 2.3012 | 0.0000 |
| 4  | 5  | 3 | 1 | 5 | 10.0081 | -2.8200 | 2.3012 | 0.0000 |
| 24 | 21 | 7 | 1 | 5 | 10.0081 | -2.8200 | 2.3012 | 0.0000 |

;CT-NT-CT-CT

|   |   |   |    |   |        |         |        |        |
|---|---|---|----|---|--------|---------|--------|--------|
| 2 | 1 | 3 | 5  | 5 | 1.7405 | -0.5356 | 2.9079 | 0.0000 |
| 2 | 1 | 7 | 21 | 5 | 1.7405 | -0.5356 | 2.9079 | 0.0000 |
| 3 | 1 | 2 | 4  | 5 | 1.7405 | -0.5356 | 2.9079 | 0.0000 |
| 3 | 1 | 7 | 21 | 5 | 1.7405 | -0.5356 | 2.9079 | 0.0000 |
| 7 | 1 | 3 | 5  | 5 | 1.7405 | -0.5356 | 2.9079 | 0.0000 |
| 7 | 1 | 2 | 4  | 5 | 1.7405 | -0.5356 | 2.9079 | 0.0000 |
| 6 | 1 | 2 | 4  | 5 | 1.7405 | -0.5356 | 2.9079 | 0.0000 |
| 6 | 1 | 3 | 5  | 5 | 1.7405 | -0.5356 | 2.9079 | 0.0000 |
| 6 | 1 | 7 | 21 | 5 | 1.7405 | -0.5356 | 2.9079 | 0.0000 |

;HC-CT-NT-CT

|    |   |   |   |   |        |        |        |        |
|----|---|---|---|---|--------|--------|--------|--------|
| 8  | 2 | 1 | 6 | 5 | 0.0000 | 0.0000 | 2.3430 | 0.0000 |
| 9  | 2 | 1 | 6 | 5 | 0.0000 | 0.0000 | 2.3430 | 0.0000 |
| 8  | 2 | 1 | 3 | 5 | 0.0000 | 0.0000 | 2.3430 | 0.0000 |
| 9  | 2 | 1 | 3 | 5 | 0.0000 | 0.0000 | 2.3430 | 0.0000 |
| 8  | 2 | 1 | 7 | 5 | 0.0000 | 0.0000 | 2.3430 | 0.0000 |
| 9  | 2 | 1 | 7 | 5 | 0.0000 | 0.0000 | 2.3430 | 0.0000 |
| 10 | 3 | 1 | 2 | 5 | 0.0000 | 0.0000 | 2.3430 | 0.0000 |
| 11 | 3 | 1 | 2 | 5 | 0.0000 | 0.0000 | 2.3430 | 0.0000 |
| 10 | 3 | 1 | 6 | 5 | 0.0000 | 0.0000 | 2.3430 | 0.0000 |
| 11 | 3 | 1 | 6 | 5 | 0.0000 | 0.0000 | 2.3430 | 0.0000 |
| 10 | 3 | 1 | 7 | 5 | 0.0000 | 0.0000 | 2.3430 | 0.0000 |
| 11 | 3 | 1 | 7 | 5 | 0.0000 | 0.0000 | 2.3430 | 0.0000 |
| 19 | 7 | 1 | 2 | 5 | 0.0000 | 0.0000 | 2.3430 | 0.0000 |

|    |   |   |   |   |        |        |        |        |
|----|---|---|---|---|--------|--------|--------|--------|
| 20 | 7 | 1 | 2 | 5 | 0.0000 | 0.0000 | 2.3430 | 0.0000 |
| 19 | 7 | 1 | 3 | 5 | 0.0000 | 0.0000 | 2.3430 | 0.0000 |
| 20 | 7 | 1 | 3 | 5 | 0.0000 | 0.0000 | 2.3430 | 0.0000 |
| 19 | 7 | 1 | 6 | 5 | 0.0000 | 0.0000 | 2.3430 | 0.0000 |
| 20 | 7 | 1 | 6 | 5 | 0.0000 | 0.0000 | 2.3430 | 0.0000 |
| 16 | 6 | 1 | 2 | 5 | 0.0000 | 0.0000 | 2.3430 | 0.0000 |
| 17 | 6 | 1 | 2 | 5 | 0.0000 | 0.0000 | 2.3430 | 0.0000 |
| 18 | 6 | 1 | 2 | 5 | 0.0000 | 0.0000 | 2.3430 | 0.0000 |
| 16 | 6 | 1 | 3 | 5 | 0.0000 | 0.0000 | 2.3430 | 0.0000 |
| 17 | 6 | 1 | 3 | 5 | 0.0000 | 0.0000 | 2.3430 | 0.0000 |
| 18 | 6 | 1 | 3 | 5 | 0.0000 | 0.0000 | 2.3430 | 0.0000 |
| 16 | 6 | 1 | 7 | 5 | 0.0000 | 0.0000 | 2.3430 | 0.0000 |
| 17 | 6 | 1 | 7 | 5 | 0.0000 | 0.0000 | 2.3430 | 0.0000 |
| 18 | 6 | 1 | 7 | 5 | 0.0000 | 0.0000 | 2.3430 | 0.0000 |

[ moleculetype ]

```

;      Name      nrexcl
      TFS         3

```

[ atoms ]

| ; nr | type | resnr | residue | atom | cgnr | charge | mass    |
|------|------|-------|---------|------|------|--------|---------|
| 1    | NI   | 1     | TFS     | NI   | 1    | -0.4   | 14.0067 |
| 2    | SO   | 1     | TFS     | SO   | 2    | 0.6    | 32.06   |
| 3    | SO   | 1     | TFS     | SO   | 3    | 0.6    | 32.06   |
| 4    | OS   | 1     | TFS     | OS   | 4    | -0.4   | 15.999  |
| 5    | OS   | 1     | TFS     | OS   | 5    | -0.4   | 15.999  |
| 6    | OS   | 1     | TFS     | OS   | 6    | -0.4   | 15.999  |
| 7    | OS   | 1     | TFS     | OS   | 7    | -0.4   | 15.999  |
| 8    | CF   | 1     | TFS     | CF   | 8    | 0.3    | 12.011  |
| 9    | CF   | 1     | TFS     | CF   | 9    | 0.3    | 12.011  |
| 10   | FC   | 1     | TFS     | FC   | 10   | -0.1   | 18.9984 |
| 11   | FC   | 1     | TFS     | FC   | 11   | -0.1   | 18.9984 |

|    |    |   |     |    |    |      |         |
|----|----|---|-----|----|----|------|---------|
| 12 | FC | 1 | TFS | FC | 12 | -0.1 | 18.9984 |
| 13 | FC | 1 | TFS | FC | 13 | -0.1 | 18.9984 |
| 14 | FC | 1 | TFS | FC | 14 | -0.1 | 18.9984 |
| 15 | FC | 1 | TFS | FC | 15 | -0.1 | 18.9984 |

[ bonds ]

|   |    |   |        |        |
|---|----|---|--------|--------|
| 1 | 2  | 1 | 0.1570 | 311300 |
| 1 | 3  | 1 | 0.1570 | 311300 |
| 2 | 6  | 1 | 0.1442 | 533100 |
| 2 | 7  | 1 | 0.1442 | 533100 |
| 2 | 9  | 1 | 0.1818 | 197000 |
| 3 | 8  | 1 | 0.1818 | 197000 |
| 3 | 4  | 1 | 0.1442 | 533100 |
| 3 | 5  | 1 | 0.1442 | 533100 |
| 8 | 10 | 1 | 0.1323 | 369700 |
| 8 | 11 | 1 | 0.1323 | 369700 |
| 8 | 12 | 1 | 0.1323 | 369700 |
| 9 | 13 | 1 | 0.1323 | 369700 |
| 9 | 14 | 1 | 0.1323 | 369700 |
| 9 | 15 | 1 | 0.1323 | 369700 |

[ angles ]

; FC-CF-FC

|    |   |    |   |       |     |
|----|---|----|---|-------|-----|
| 13 | 9 | 14 | 1 | 107.1 | 781 |
| 13 | 9 | 15 | 1 | 107.1 | 781 |
| 14 | 9 | 15 | 1 | 107.1 | 781 |
| 10 | 8 | 11 | 1 | 107.1 | 781 |
| 10 | 8 | 12 | 1 | 107.1 | 781 |
| 11 | 8 | 12 | 1 | 107.1 | 781 |

; FC-CF-SO

|    |   |   |   |       |     |
|----|---|---|---|-------|-----|
| 13 | 9 | 2 | 1 | 111.7 | 694 |
| 14 | 9 | 2 | 1 | 111.7 | 694 |

|               |   |    |    |       |        |        |         |        |  |
|---------------|---|----|----|-------|--------|--------|---------|--------|--|
| 15            | 9 | 2  | 1  | 111.7 | 694    |        |         |        |  |
| 3             | 8 | 10 | 1  | 111.7 | 694    |        |         |        |  |
| 3             | 8 | 11 | 1  | 111.7 | 694    |        |         |        |  |
| 3             | 8 | 12 | 1  | 111.7 | 694    |        |         |        |  |
| ; CF-SO-OS    |   |    |    |       |        |        |         |        |  |
| 9             | 2 | 6  | 1  | 102.6 | 870    |        |         |        |  |
| 9             | 2 | 7  | 1  | 102.6 | 870    |        |         |        |  |
| 9             | 2 | 1  | 1  | 102.6 | 870    |        |         |        |  |
| 4             | 3 | 8  | 1  | 102.6 | 870    |        |         |        |  |
| 5             | 3 | 8  | 1  | 102.6 | 870    |        |         |        |  |
| ; SO-NI-SO    |   |    |    |       |        |        |         |        |  |
| 2             | 1 | 3  | 1  | 126.6 | 671    |        |         |        |  |
| ; OS-SO-NI    |   |    |    |       |        |        |         |        |  |
| 6             | 2 | 1  | 1  | 113.6 | 789    |        |         |        |  |
| 7             | 2 | 1  | 1  | 113.6 | 789    |        |         |        |  |
| 1             | 3 | 4  | 1  | 113.6 | 789    |        |         |        |  |
| 1             | 3 | 5  | 1  | 113.6 | 789    |        |         |        |  |
| ; NI-SO-CF    |   |    |    |       |        |        |         |        |  |
| 1             | 3 | 8  | 1  | 100.2 | 816    |        |         |        |  |
| ; OS-SO-OS    |   |    |    |       |        |        |         |        |  |
| 6             | 2 | 7  | 1  | 118.5 | 969    |        |         |        |  |
| 4             | 3 | 5  | 1  | 118.5 | 969    |        |         |        |  |
| [ dihedrals ] |   |    |    |       |        |        |         |        |  |
| ; S-N-S-O     |   |    |    |       |        |        |         |        |  |
| 3             | 1 | 2  | 6  | 5     | 0.0000 | 0.0000 | -0.0150 | 0.0000 |  |
| 3             | 1 | 2  | 7  | 5     | 0.0000 | 0.0000 | -0.0150 | 0.0000 |  |
| 2             | 1 | 3  | 4  | 5     | 0.0000 | 0.0000 | -0.0150 | 0.0000 |  |
| 2             | 1 | 3  | 5  | 5     | 0.0000 | 0.0000 | -0.0150 | 0.0000 |  |
| ; N-S-C-F     |   |    |    |       |        |        |         |        |  |
| 1             | 3 | 8  | 10 | 5     | 0.0000 | 0.0000 | 1.3220  | 0.0000 |  |
| 1             | 3 | 8  | 11 | 5     | 0.0000 | 0.0000 | 1.3220  | 0.0000 |  |

|   |   |   |    |   |        |        |        |        |
|---|---|---|----|---|--------|--------|--------|--------|
| 1 | 3 | 8 | 12 | 5 | 0.0000 | 0.0000 | 1.3220 | 0.0000 |
| 1 | 2 | 9 | 13 | 5 | 0.0000 | 0.0000 | 1.3220 | 0.0000 |
| 1 | 2 | 9 | 14 | 5 | 0.0000 | 0.0000 | 1.3220 | 0.0000 |
| 1 | 2 | 9 | 15 | 5 | 0.0000 | 0.0000 | 1.3220 | 0.0000 |

;O-S-C-F

|   |   |   |    |   |        |        |        |        |
|---|---|---|----|---|--------|--------|--------|--------|
| 5 | 3 | 8 | 10 | 5 | 0.0000 | 0.0000 | 1.4510 | 0.0000 |
| 5 | 3 | 8 | 11 | 5 | 0.0000 | 0.0000 | 1.4510 | 0.0000 |
| 5 | 3 | 8 | 12 | 5 | 0.0000 | 0.0000 | 1.4510 | 0.0000 |
| 4 | 3 | 8 | 10 | 5 | 0.0000 | 0.0000 | 1.4510 | 0.0000 |
| 4 | 3 | 8 | 11 | 5 | 0.0000 | 0.0000 | 1.4510 | 0.0000 |
| 4 | 3 | 8 | 12 | 5 | 0.0000 | 0.0000 | 1.4510 | 0.0000 |
| 6 | 2 | 9 | 13 | 5 | 0.0000 | 0.0000 | 1.4510 | 0.0000 |
| 6 | 2 | 9 | 14 | 5 | 0.0000 | 0.0000 | 1.4510 | 0.0000 |
| 6 | 2 | 9 | 15 | 5 | 0.0000 | 0.0000 | 1.4510 | 0.0000 |
| 7 | 2 | 9 | 13 | 5 | 0.0000 | 0.0000 | 1.4510 | 0.0000 |
| 7 | 2 | 9 | 14 | 5 | 0.0000 | 0.0000 | 1.4510 | 0.0000 |
| 7 | 2 | 9 | 15 | 5 | 0.0000 | 0.0000 | 1.4510 | 0.0000 |

;S-N-S-C

|   |   |   |   |   |         |          |         |        |
|---|---|---|---|---|---------|----------|---------|--------|
| 3 | 1 | 2 | 9 | 5 | 32.7730 | -10.4200 | -3.1950 | 0.0000 |
| 2 | 1 | 3 | 8 | 5 | 32.7730 | -10.4200 | -3.1950 | 0.0000 |

[ moleculetype ]

|   |         |        |
|---|---------|--------|
| ; | molname | nrexcl |
|   | Li+     | 1      |

[ atoms ]

|   |    |      |       |        |      |      |        |       |
|---|----|------|-------|--------|------|------|--------|-------|
| ; | nr | type | resnr | residu | atom | cgnr | charge | mass  |
|   | 1  | Li   | 3     | Li+    | Li1  | 1    | 0.7071 | 6.941 |

[ moleculetype ]

|   |         |        |
|---|---------|--------|
| ; | molname | nrexcl |
|   | O2-     | 1      |

[ atoms ]

; OA - oxygen in superoxyde anion

| ; nr | type | resnr | residu | atom | cgnr | charge   | mass    |
|------|------|-------|--------|------|------|----------|---------|
| 1    | OA   | 4     | O2-    | OA1  | 1    | -0.35355 | 15.9994 |
| 2    | OA   | 4     | O2-    | OA2  | 1    | -0.35355 | 15.9994 |

[ bonds ]

| ; i | j | funct | length | force.c. |
|-----|---|-------|--------|----------|
| 1   | 2 | 1     | 0.1340 | 357225.2 |

[ moleculetype ]

| ; molname | nrexcl |
|-----------|--------|
| O22-      | 1      |

[ atoms ]

; OAA - oxygen in O2 2- ion

| ; nr | type | resnr | residu | atom | cgnr | charge  | mass    |
|------|------|-------|--------|------|------|---------|---------|
| 1    | OAA  | 4     | O2-    | OA1  | 1    | -0.7071 | 15.9994 |
| 2    | OAA  | 4     | O2-    | OA2  | 1    | -0.7071 | 15.9994 |

[ bonds ]

| ; i | j | funct | length | force.c. |
|-----|---|-------|--------|----------|
| 1   | 2 | 1     | 0.1530 | 133826.7 |

[ moleculetype ]

| ; molname | nrexcl |
|-----------|--------|
| CO3       | 1      |

[ atoms ]

; CO3 2-

| ; nr | type | resnr | residu | atom | cgnr | charge | mass |
|------|------|-------|--------|------|------|--------|------|
|------|------|-------|--------|------|------|--------|------|



|   |    |   |     |     |   |         |         |
|---|----|---|-----|-----|---|---------|---------|
| 1 | CO | 4 | CO3 | CO  | 0 | 1.0227  | 12.011  |
| 2 | OC | 4 | CO3 | OC1 | 1 | -0.8123 | 15.9994 |
| 3 | OC | 4 | CO3 | OC2 | 2 | -0.8123 | 15.9994 |
| 4 | OC | 4 | CO3 | OC3 | 3 | -0.8123 | 15.9994 |

[ bonds ]

| ; i | j | funct | length | force.c. |
|-----|---|-------|--------|----------|
| 1   | 2 | 1     | 0.130  | 612000   |
| 1   | 3 | 1     | 0.130  | 612000   |
| 1   | 4 | 1     | 0.130  | 612000   |

[ angles ]

| ; ai    | aj | ak | funct | c0    | c1   |
|---------|----|----|-------|-------|------|
| ; O-C-O |    |    |       |       |      |
| 2       | 1  | 3  | 1     | 120.0 | 1190 |
| 3       | 1  | 4  | 1     | 120.0 | 1190 |
| 4       | 1  | 2  | 1     | 120.0 | 1190 |

[ dihedrals ]

| ; ai                                     | aj | ak | al | funct | c0    | c1  |
|------------------------------------------|----|----|----|-------|-------|-----|
| ; O-C-O-O improper dihedral out of plane |    |    |    |       |       |     |
| 2                                        | 1  | 3  | 4  | 2     | 180.0 | 268 |
| 4                                        | 1  | 2  | 3  | 2     | 180.0 | 268 |
| 3                                        | 1  | 4  | 2  | 2     | 180.0 | 268 |
